# Supplementary material for: Relationship between Biomass Burning Emissions and Deforestation in Amazonia over the Last Two Decades
Source: MDPI journal article supplement (doi:10.3390/f12091217), 2021-09-07
Supplement: s1 [file s1]

## Article

# Relationship Between Biomass Burning Emissions and Deforestation in Amazonia Over the Last Two Decades

## Supplementary Materials

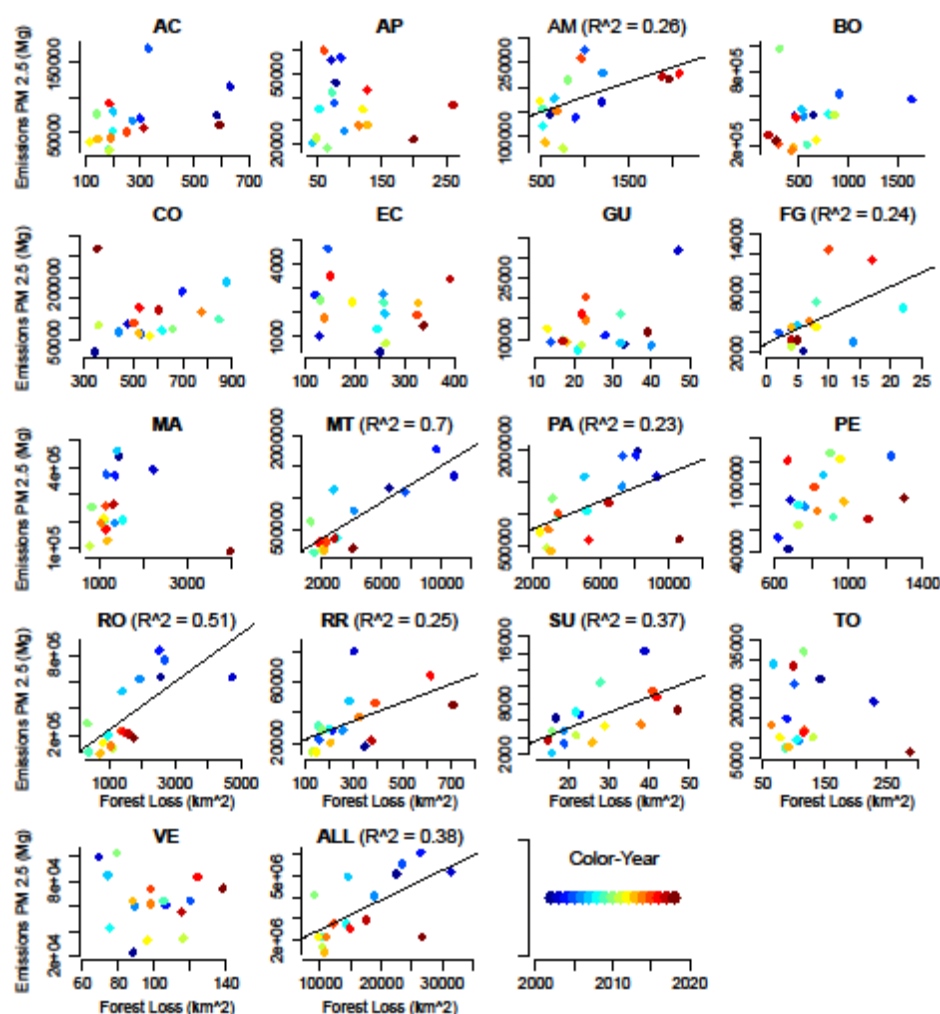

**Figure S1.** Relationship between annual PM<sub>2.5</sub> emitted from biomass burning and annual deforestation in the 17 Amazonian countries/states from 2002 to 2018. AC = Acre, AP = Amapá, AM = Amazonas, BO = Bolivia, CO = Colombia, EC = Ecuador, GU = Guiana, FG = French Guiana, MA = Maranhão, MT = Mato Grosso, PA = Pará, PE = Peru, RO = Rondônia, RR = Roraima, SU = Suriname, TO = Tocantins, VE = Venezuela, and ALL = Amazonia.

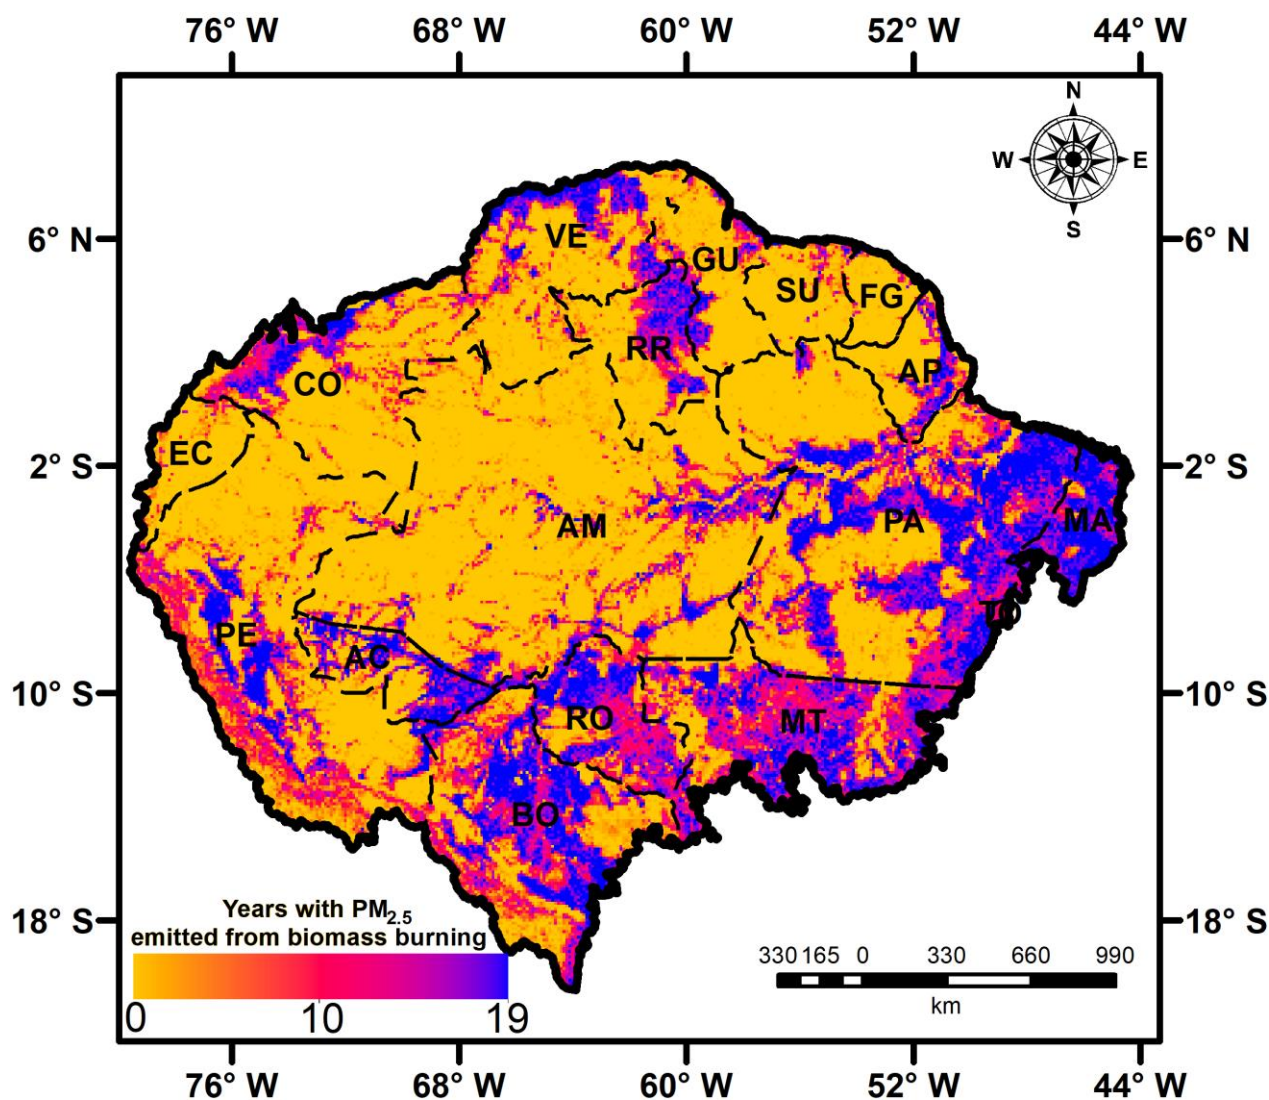

**Figure S2.** Number of years when emission of PM<sub>2.5</sub> associated with biomass burning was detected in Amazonia during the 2002–2020 period. Estimates were obtained using the 3BEM\_FRP model at the spatial resolution of 0.1°.

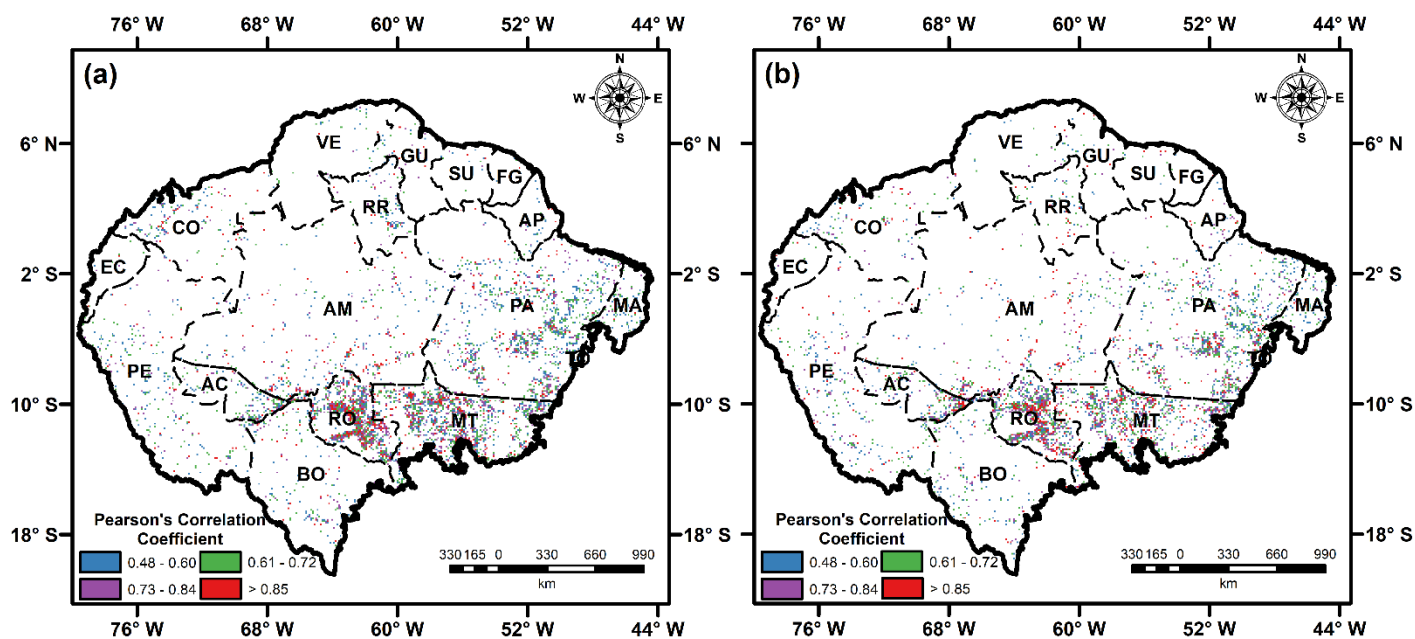

**Figure S3.** Pearson's correlation coefficient between the pair of variables PM<sub>2.5</sub> emitted from biomass burning and 1-year lagged deforestation (a), and between PM<sub>2.5</sub> emitted from biomass burning and 2-years lagged deforestation (b) in Amazonia. Only statistically significant pixels are shown in this figure. BO = Bolivia, CO = Colombia, EC = Ecuador, FG = French Guiana, GU = Guiana, PE = Peru, SU = Suriname, VE = Venezuela, AC = Acre, AM = Amazonas, AP = Amapá, MA = Maranhão, MT = Mato Grosso, RO = Rondônia, RR = Roraima, PA = Pará, and TO = Tocantins.

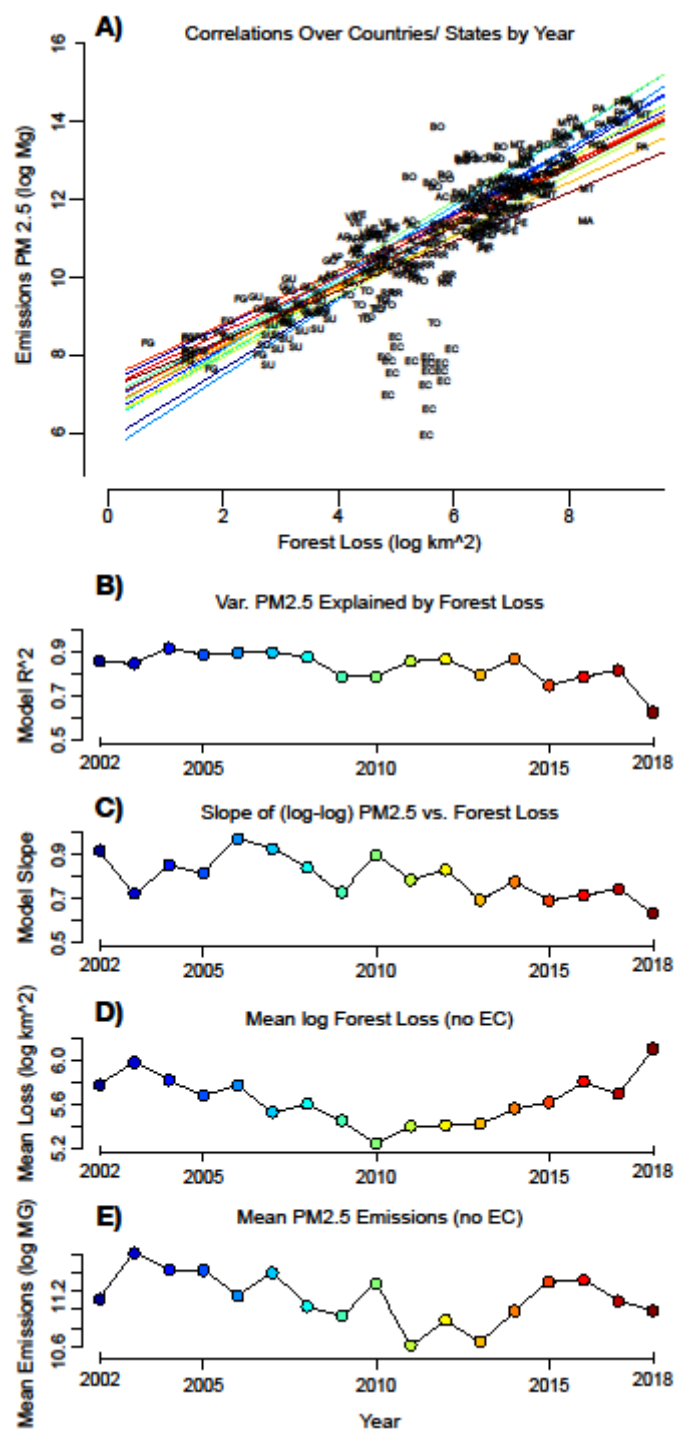

**Figure S4.** By-year correlations between PM<sub>2.5</sub> emitted from biomass burning and deforestation on the country/state level data (a), variance of PM<sub>2.5</sub> emitted from biomass burning explained by deforestation (b), slope of PM<sub>2.5</sub> emitted from biomass burning vs. deforestation (c). Correlations were best on a log-log not regular scale (heteroskedasticity on the residuals). Ecuador (EC) was a low deforestation outlier and therefore was excluded to focus on the major deforestation countries/states in (d) and (e).

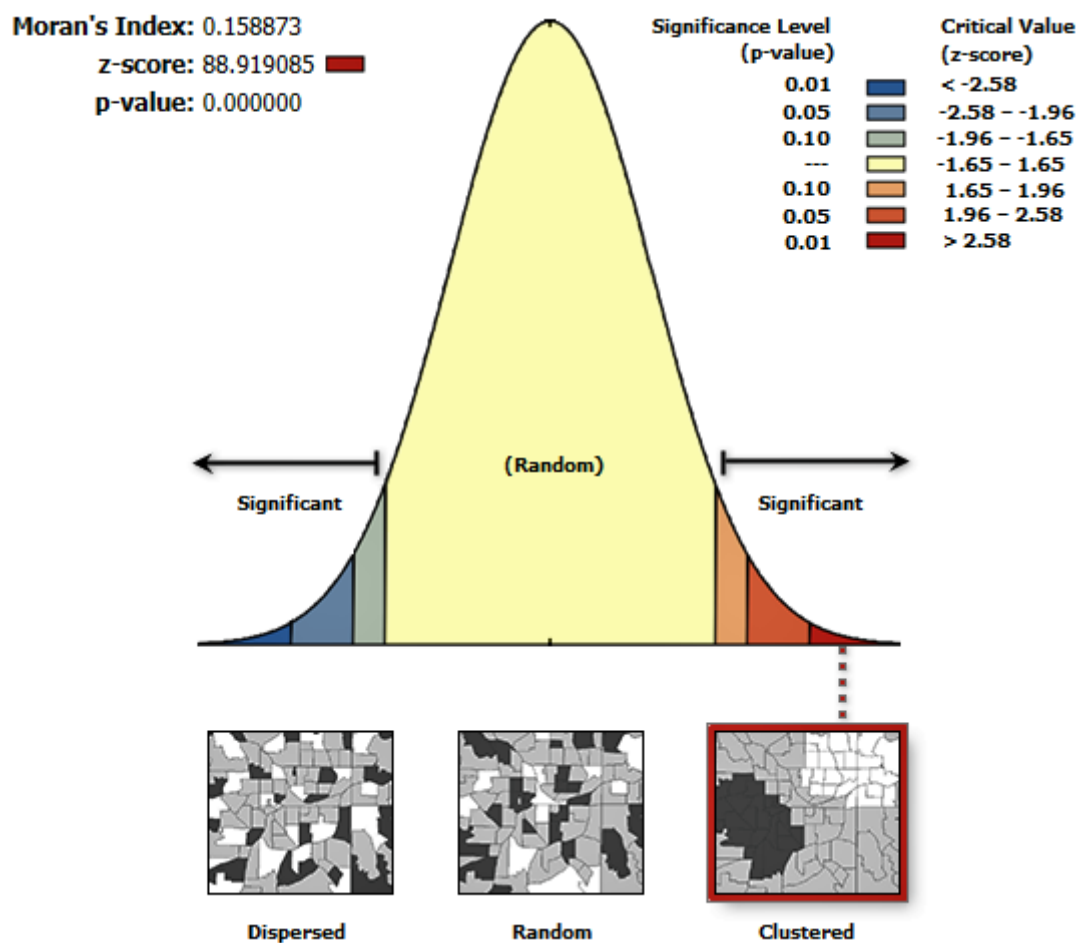

**Figure S5.** Global Moran's Index representing the correlation in space between PM<sub>2.5</sub> emitted from biomass burning and deforestation in Amazonia. We have considered only three years -highest emission (2004), lowest emission (2009), and closest to the overall average (2017)- to calculate the index in order to not control autocorrelation. Only above-zero emission grid cells were considered. Given the z-score of 88.919, there is a less than 1% probability that this clustered pattern could be the result of random chance.

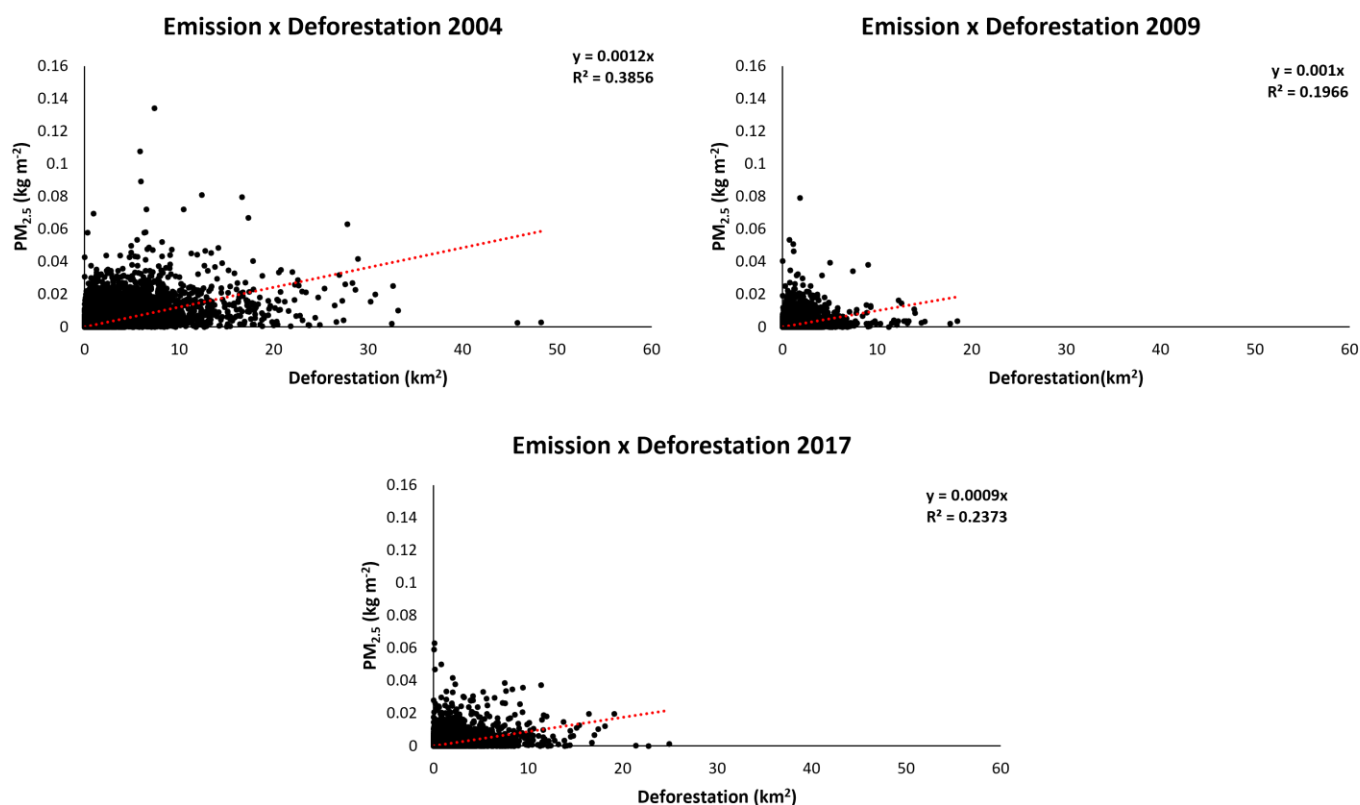

**Figure S6.** Relationship between PM<sub>2.5</sub> emitted from biomass burning and deforestation in Amazonia. Only above-zero emission and deforestation grid cells were considered in this figure. We have considered only three years -highest emission (2004), lowest emission (2009), and closest to the overall average (2017)- in order to highlight that R<sup>2</sup> values were highest in the year of highest deforestation (2004) and lowest in the year of lowest deforestation (2009).

**Table S1.** Fine particulate matter with diameter less than 2.5  $\mu\text{m}$  ( $\text{PM}_{2.5}$ ) emission factors adopted in previous versions of 3BEM\_FRP, in 3BEM\_FRP version 1.8.3 when estimating global  $\text{PM}_{2.5}$  associated with biomass burning emissions, and in 3BEM\_FRP version 1.8.3 when estimating  $\text{PM}_{2.5}$  associated with biomass burning in South America.

| Land Use and Land Cover | <b><math>\text{PM}_{2.5}</math> Emission Factors (<math>\text{g kg}^{-1}</math>)</b> |                            |                                   |
|-------------------------|--------------------------------------------------------------------------------------|----------------------------|-----------------------------------|
|                         | 3BEM_FRP<br>(Previous Versions)                                                      | 3BEM_FRP<br>1.8.3 (Global) | 3BEM_FRP<br>1.8.3 (South America) |
| Tropical Forest         | 9.1                                                                                  | 8.3                        | 9.4                               |
| Extratropical Forest    | 13                                                                                   | 15.7                       | 15.7                              |
| Savanna / Grassland     | 4.9                                                                                  | 7.5                        | 4.0                               |
| Pasture / Croplands     | 4.9                                                                                  | 7.5                        | 4.0                               |
