# Supplementary material for: Relationship between Biomass Burning Emissions and Deforestation in Amazonia over the Last Two Decades
Source: MDPI journal article supplement (doi:10.3390/f12091217), 2021-09-07
Supplement: s1 [file s1]

Archive with 1 entries (1 files):
- Supplementary_Forests_2021_Revised.pdf
